# Supplementary material for: A facile approach for achieving an effective dual sorption ability of Si/SH/S grafted sodium montmorillonite
Source: Royal Society of Chemistry journal article supplement (doi:10.1039/c5ra10155g), 2015-01-01
Supplement: c5ra10155g1.pdf [file c5ra10155g1.pdf]

**SUPPORTING INFORMATION**

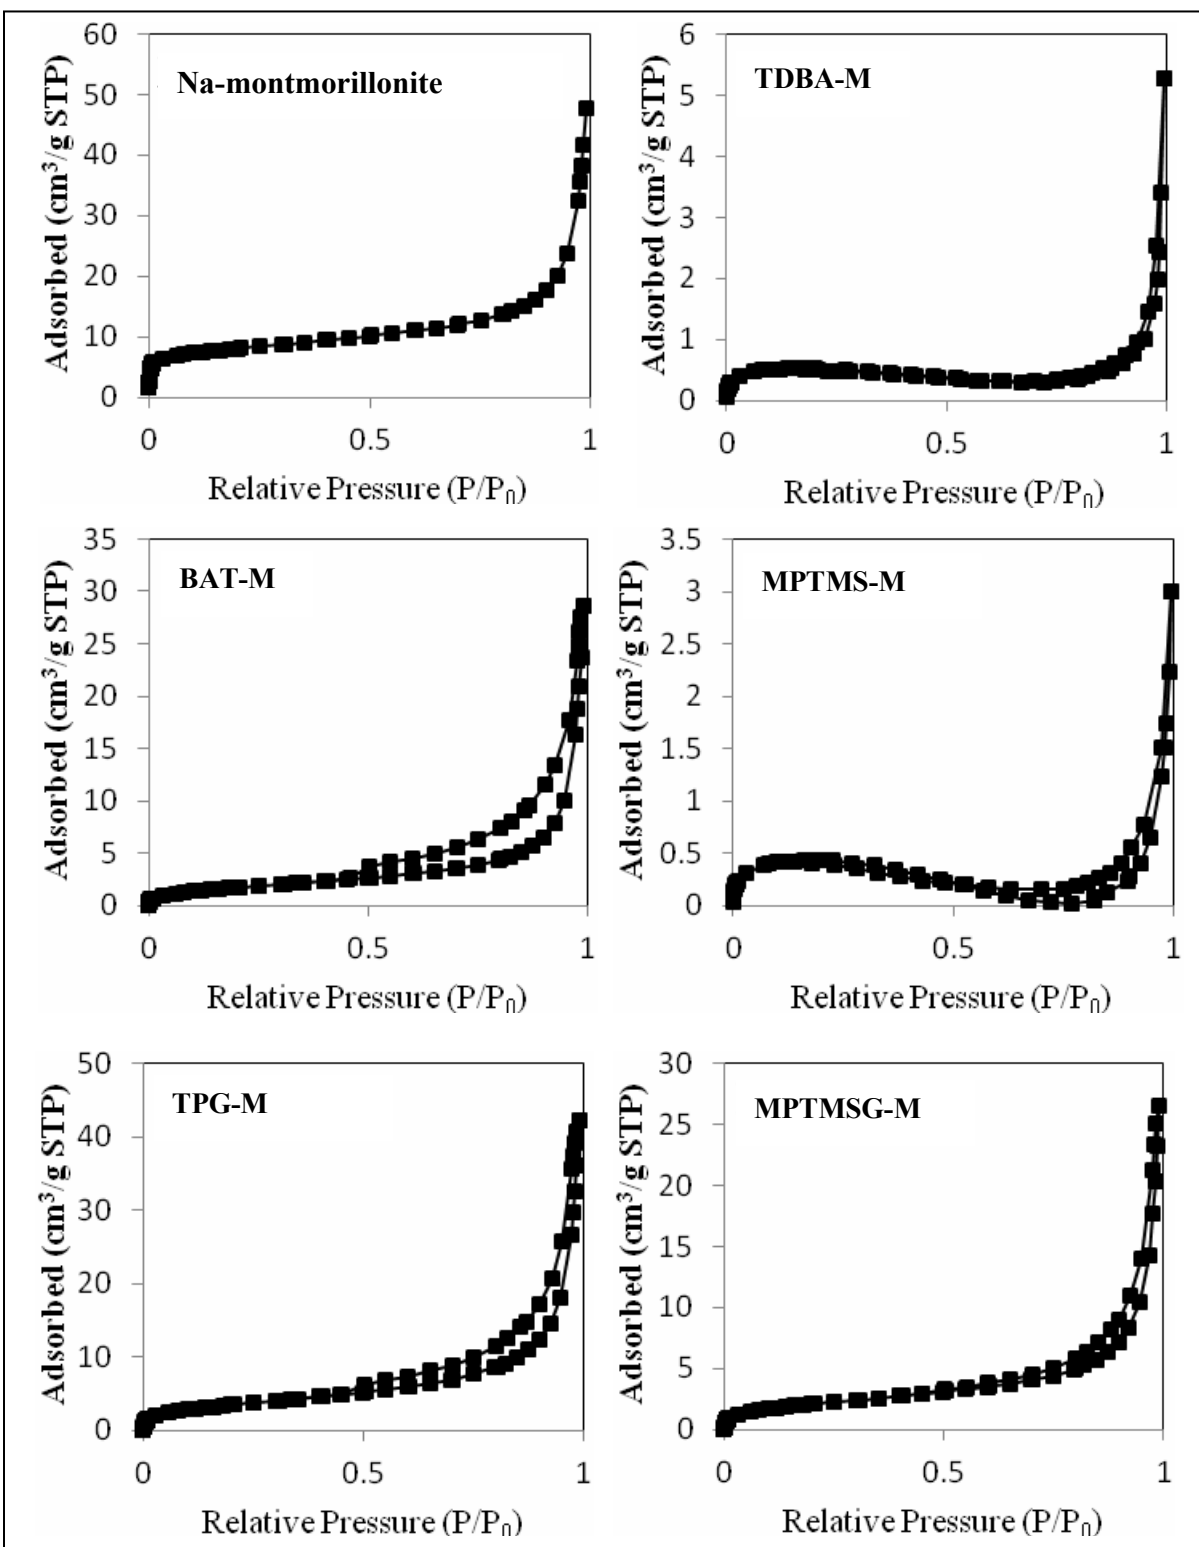

**Fig. S1:**  $N_2$  adsorption isotherms of unmodified and modified montmorillonites
